# Supplementary material
Source: PubMed Central journal article supplement (PMC10251157)

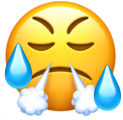

**EXTREMELY Hard (17-20)**

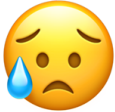

**Hard or heavy (15-16)**

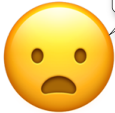

**SOMEWHAT hard (13-14)**

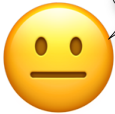

**Light (11-12)**

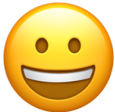

**VERY light (6-10)**

Supplement: NIHMS1888188-supplement-Supp_fig_emoji_pdf.pdf [file NIHMS1888188-supplement-Supp_fig_emoji_pdf.pdf]
